# Supplementary figures and images for: FGF signal-dependent segregation of primitive endoderm and epiblast in the mouse blastocyst
Source: Oxford University Press journal article supplement (doi:10.1242/dev.043471), 2010-02-10

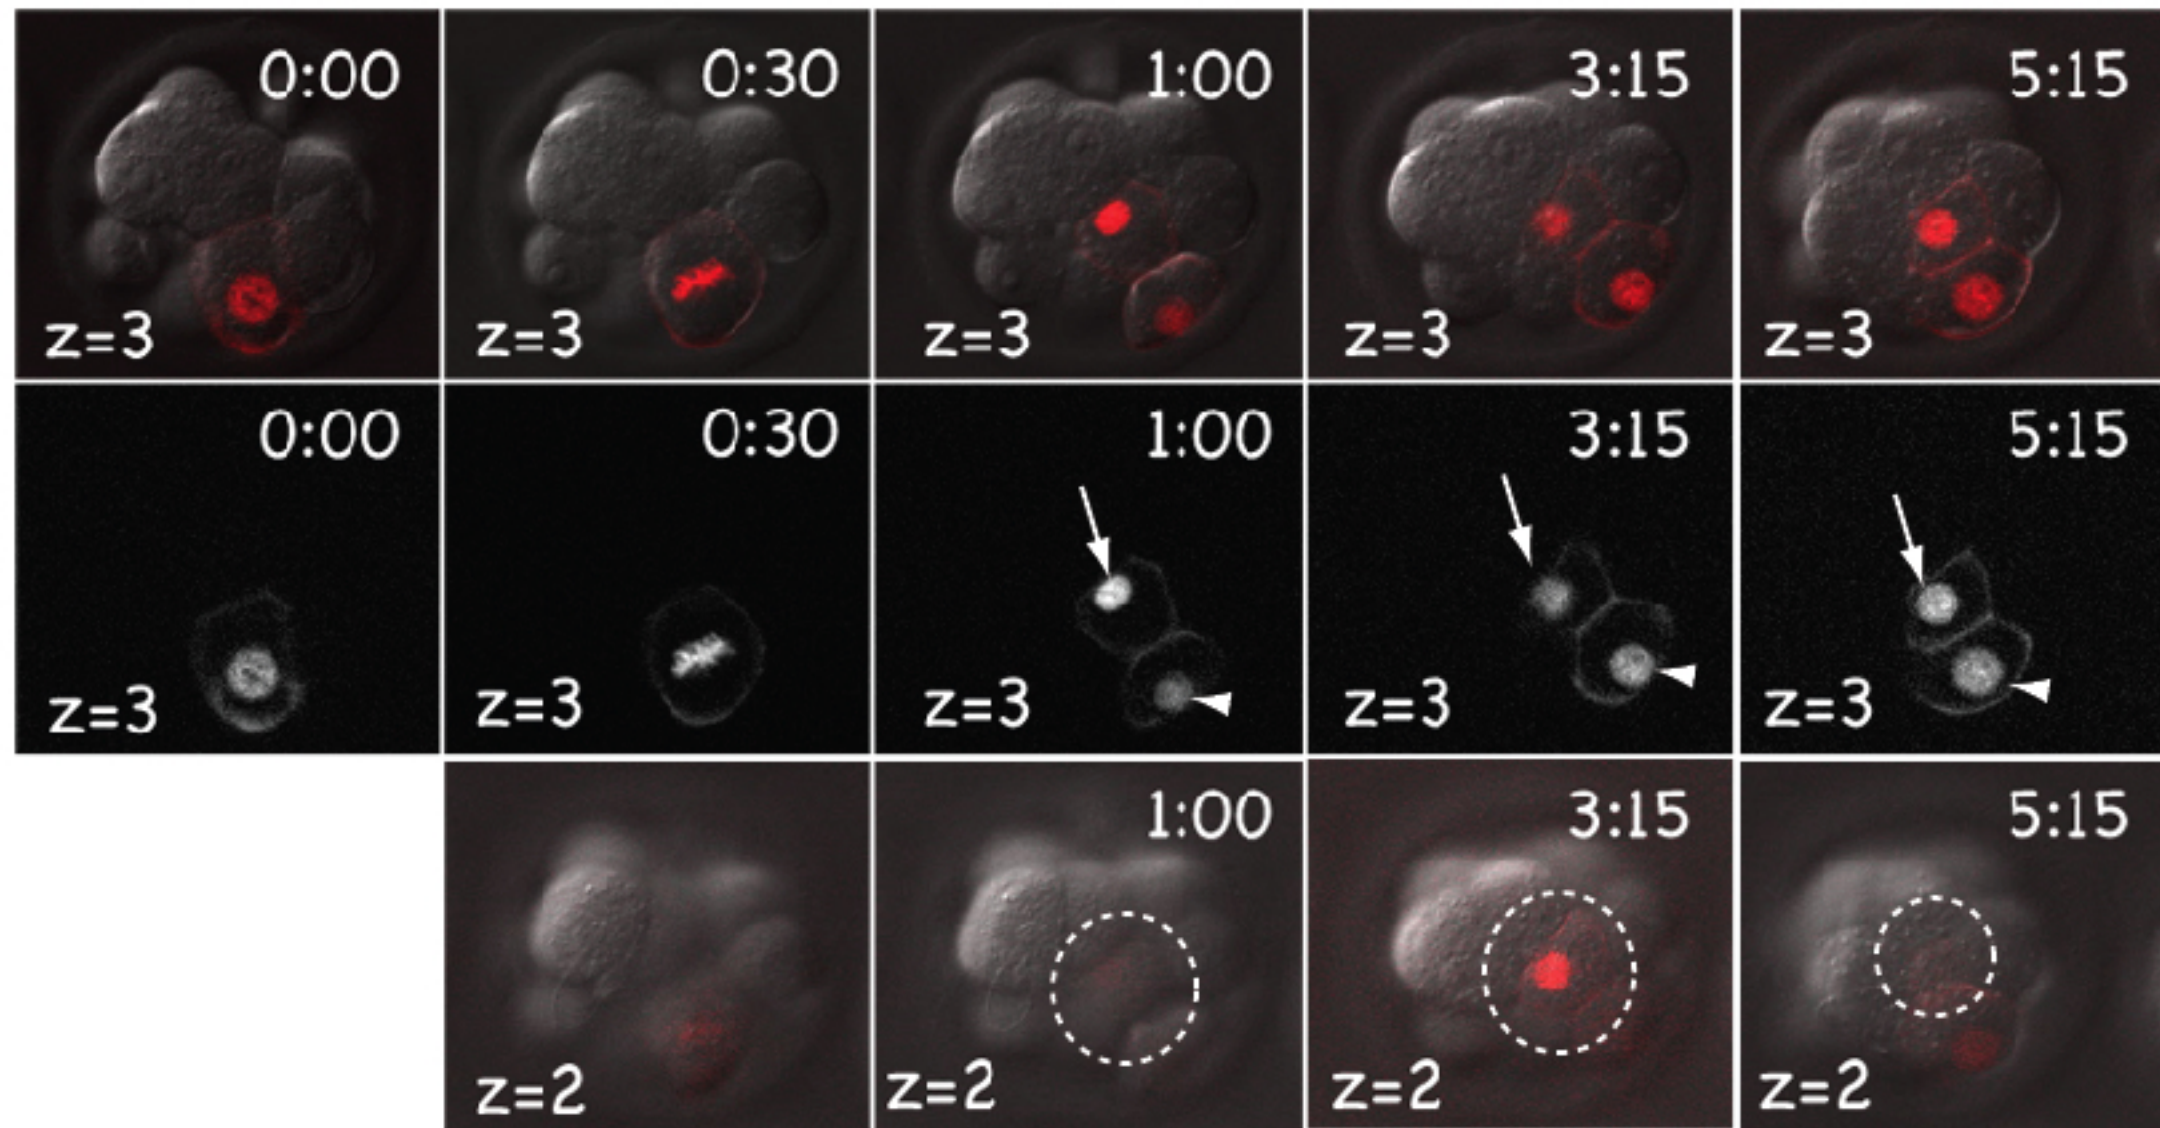

Yamanaka et al., Supplementary Fig.1

Supplement: dev043471-sup-043471figs1.pdf [file dev043471-sup-043471figs1.pdf]

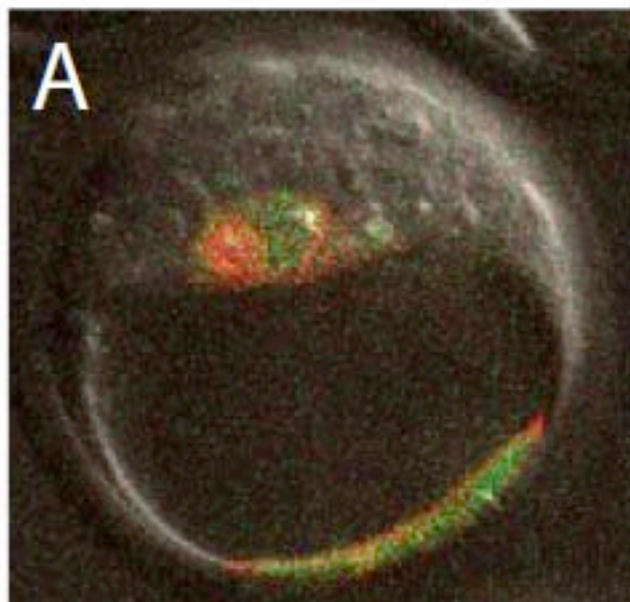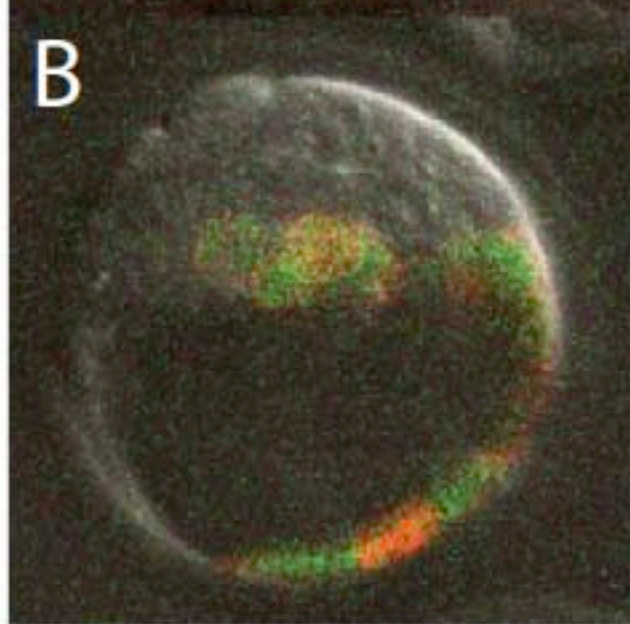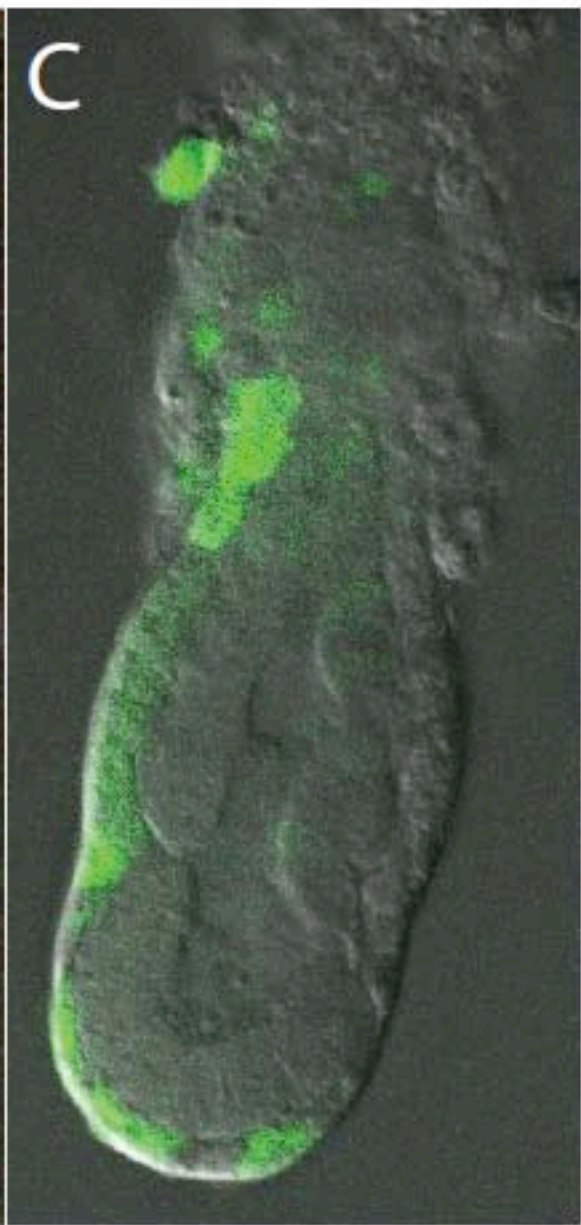

Supplement: dev043471-sup-043471figs2.pdf [file dev043471-sup-043471figs2.pdf]

cultured with 3i

A

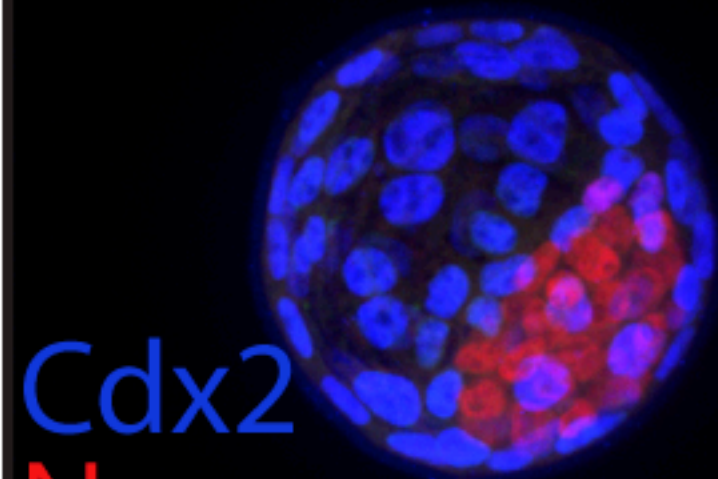

Cdx2  
Nanog  
Gata6

3i removed E3.75

B

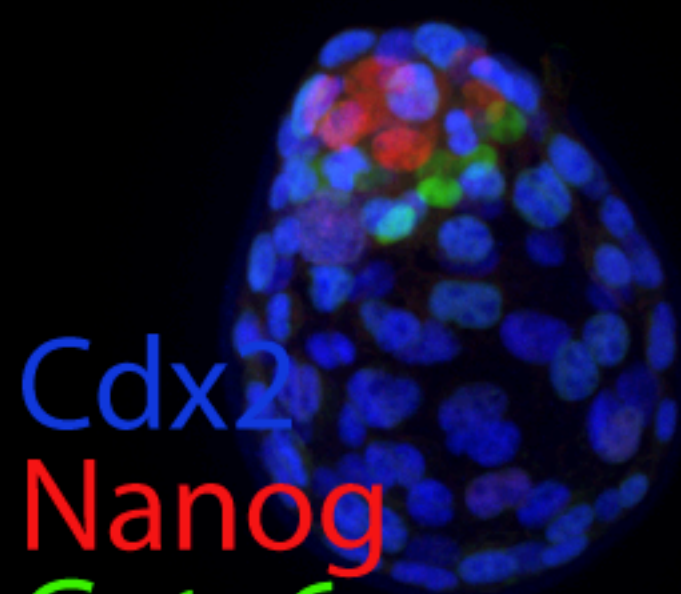

Cdx2  
Nanog  
Gata6

C

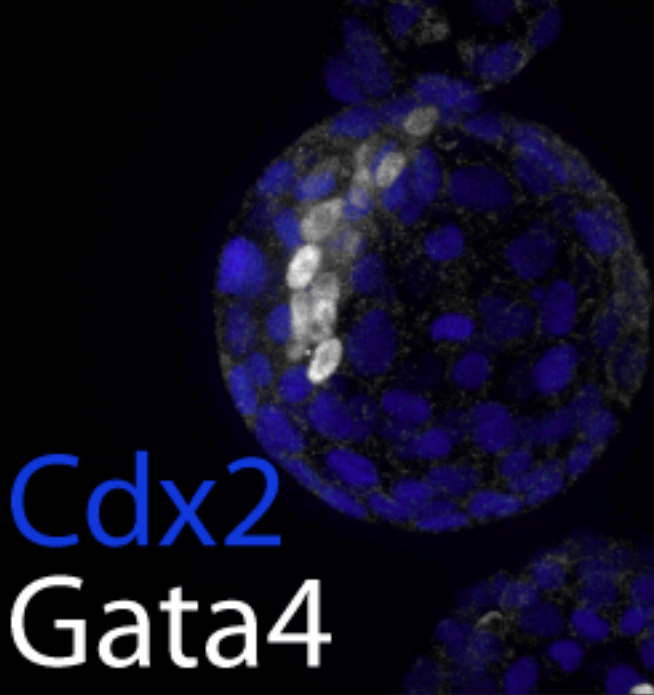

Cdx2  
Gata4

Supplement: dev043471-sup-043471figs3.pdf [file dev043471-sup-043471figs3.pdf]

Gata6  
Nanog  
Nucleus

Nanog

Gata6

E3.3

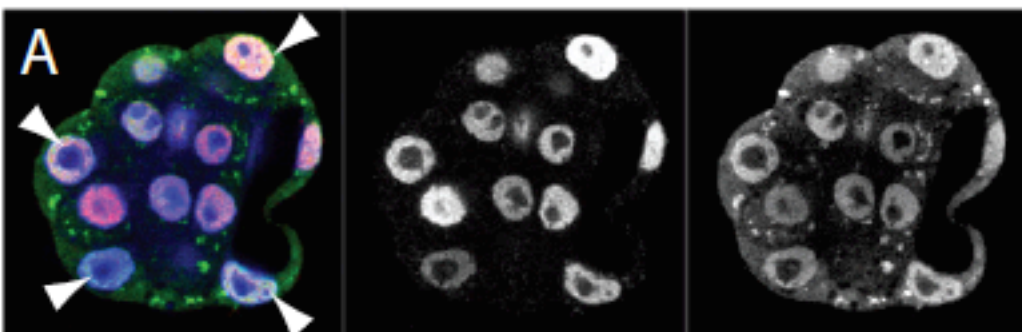

E3.5

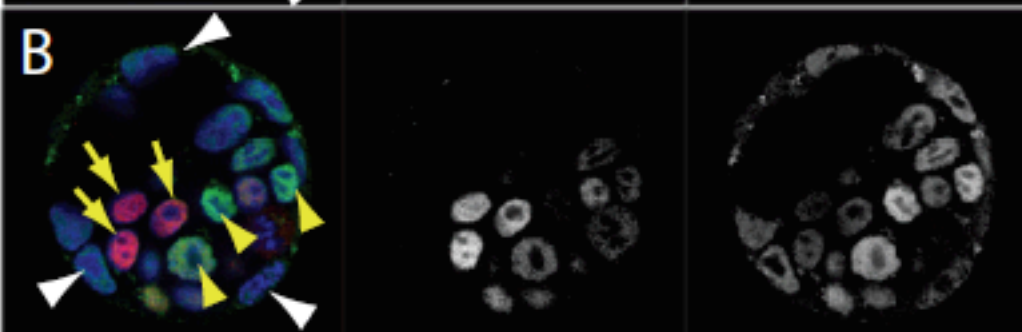

E3.75

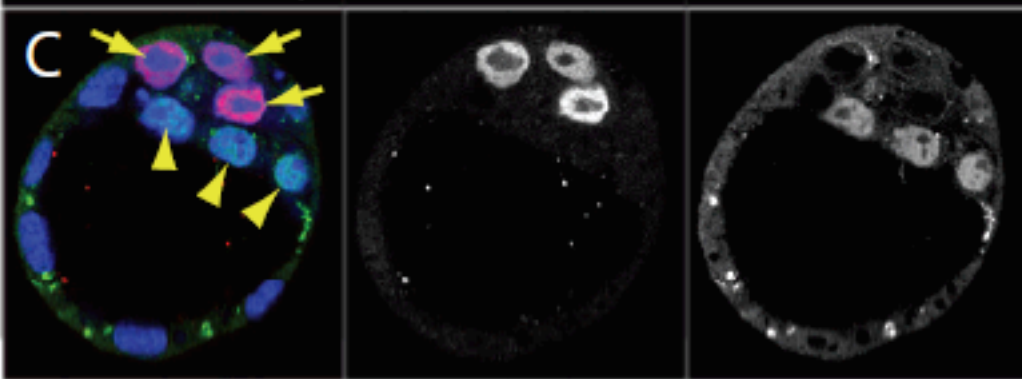

Gata6  
Gata4  
Nucleus

Gata6

Gata4

E3.3

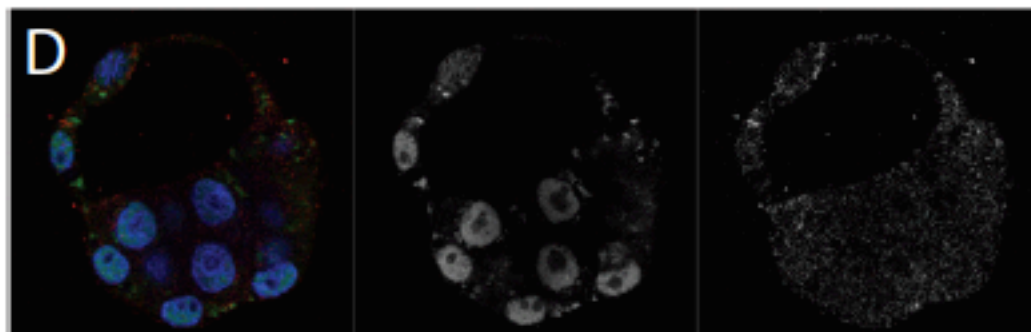

E3.5

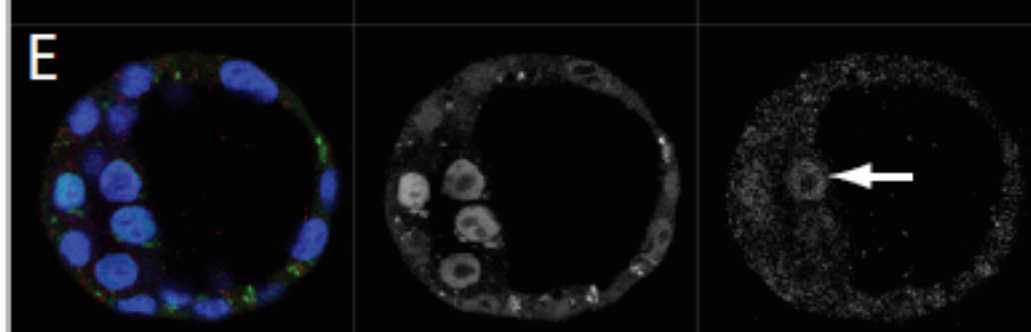

E3.75

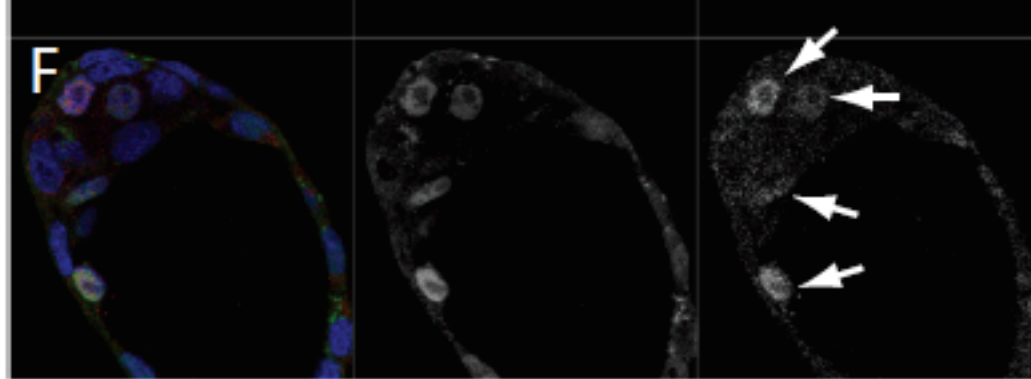

Supplement: dev043471-sup-043471figs4.pdf [file dev043471-sup-043471figs4.pdf]

Nanog

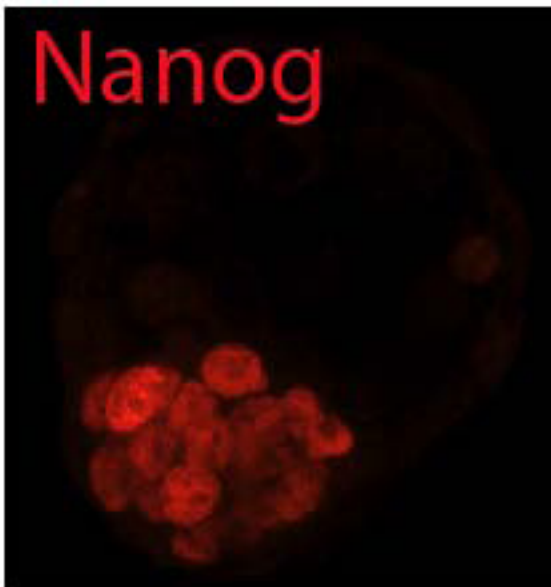

Gata6

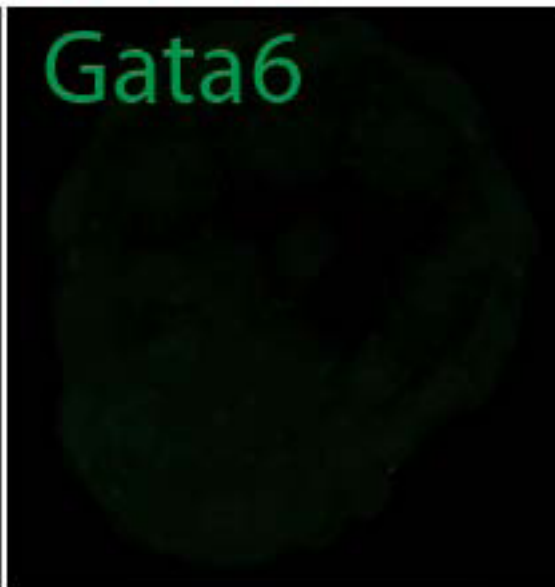

anti-GFP

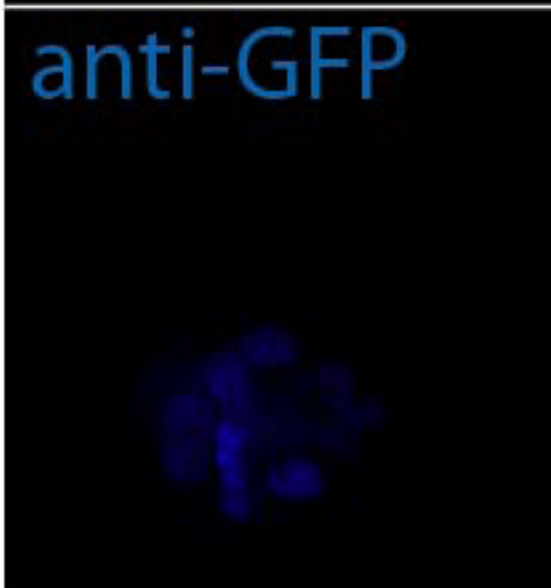

Dapi

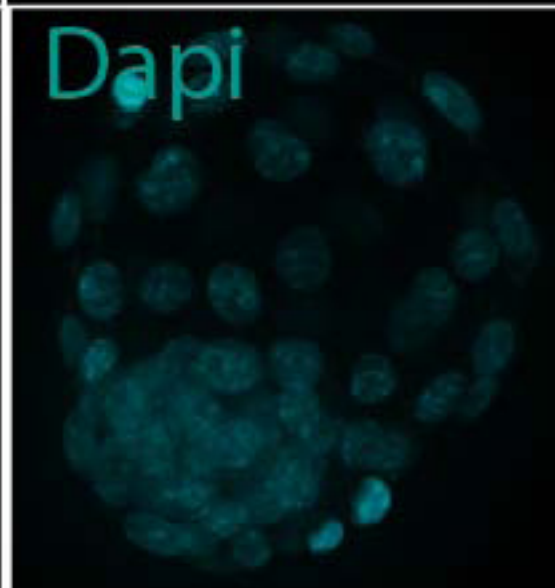

Supplement: dev043471-sup-043471figs5.pdf [file dev043471-sup-043471figs5.pdf]

A. 8-cell division

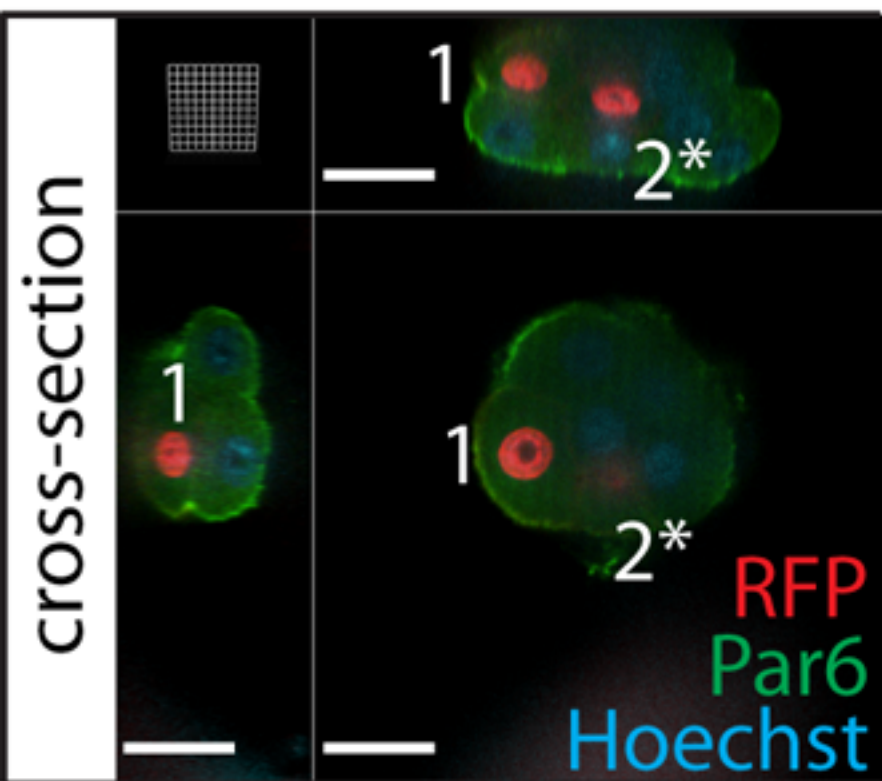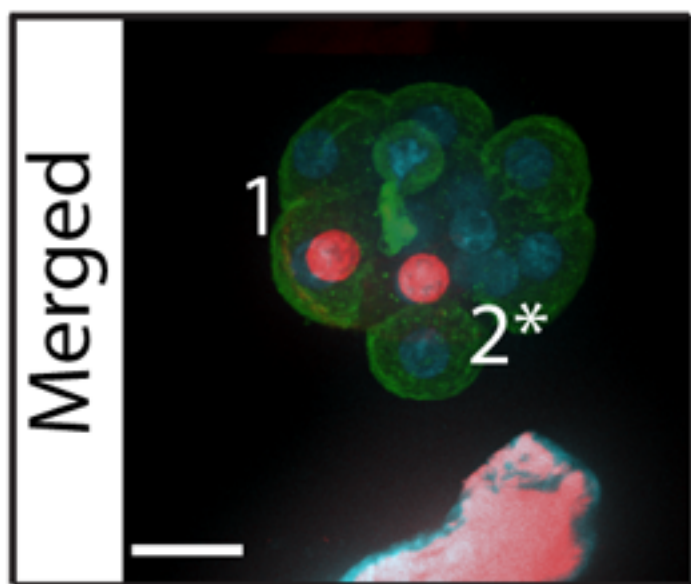

B. early 16-cell division

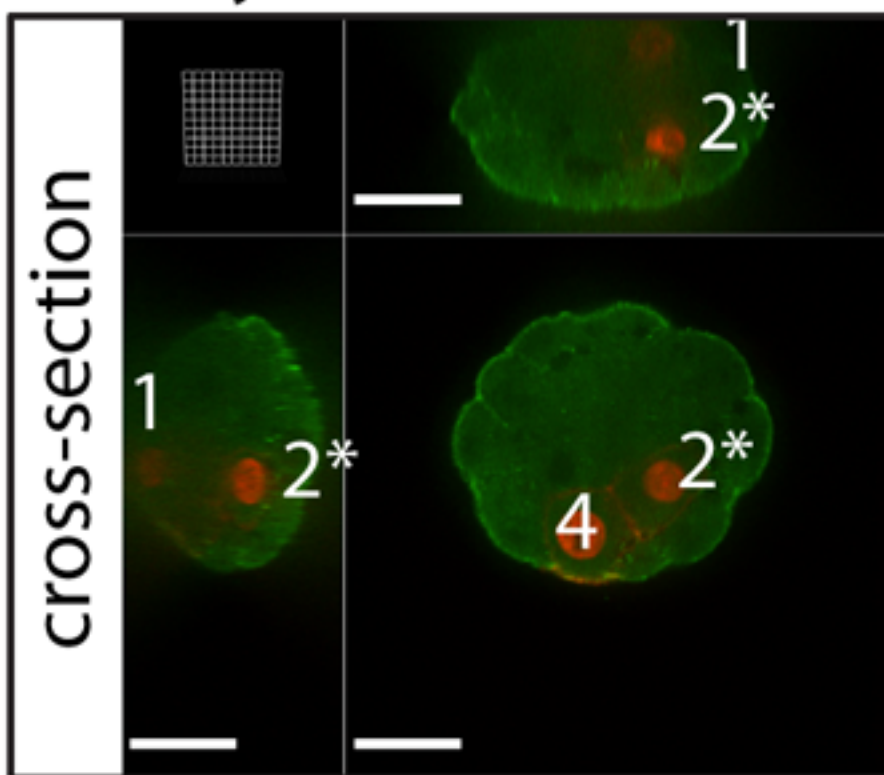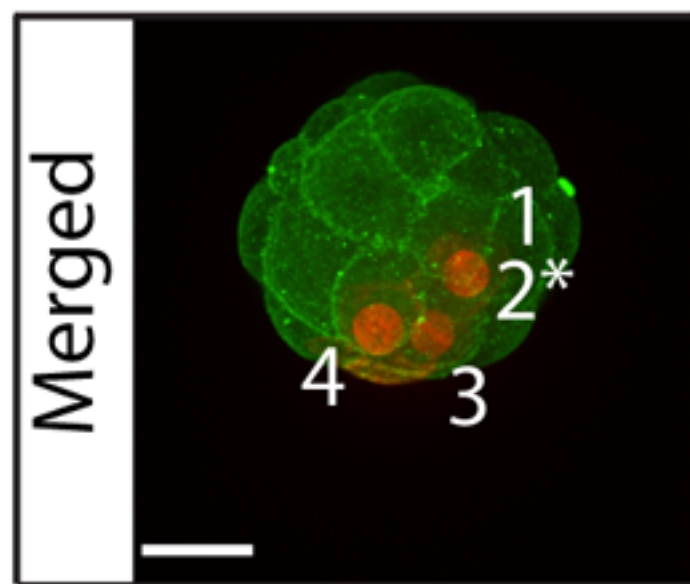

C. late 16-cell division

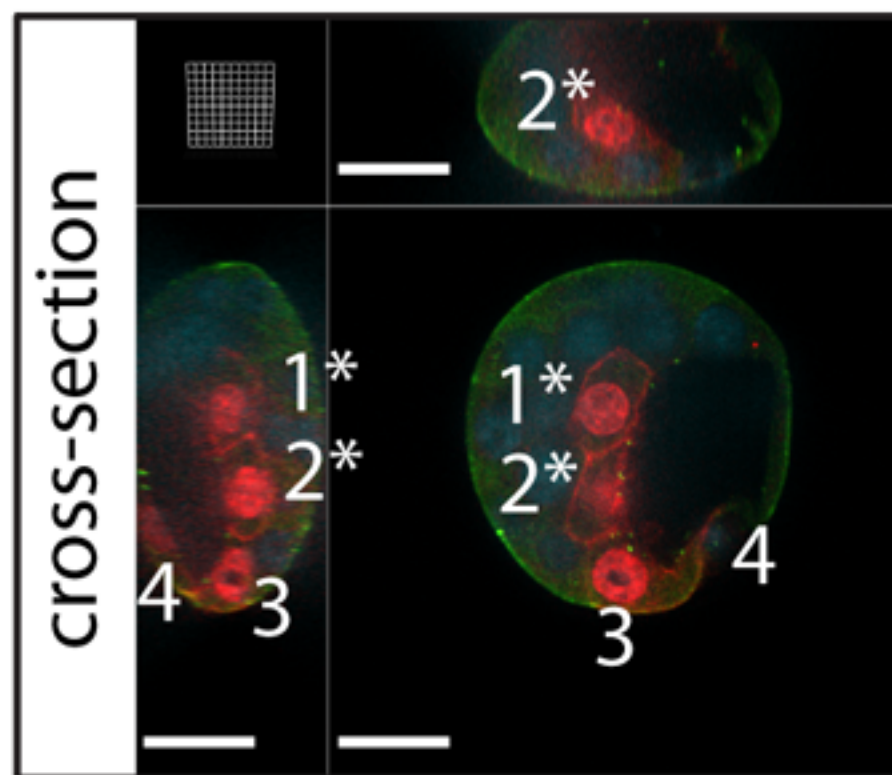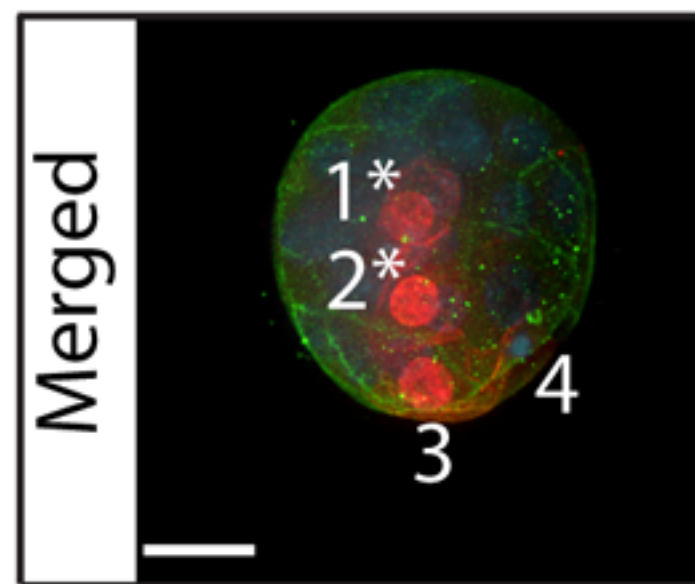

Supplement: dev043471-sup-043471figs6.pdf [file dev043471-sup-043471figs6.pdf]
